# Supplementary material for: ‘Learn from the lessons and don’t forget them’: identifying transferable lessons for COVID-19 from meningitis A, yellow fever and Ebola virus disease vaccination campaigns
Source: PubMed Central journal article supplement — BMJ Glob Health. 2021 Sep 17;6(9):e006951. doi: 10.1136/bmjgh-2021-006951 (PMC8450956; doi:10.1136/bmjgh-2021-006951), 2021-09-17
Supplement: bmjgh-2021-006951supp001.pdf [file bmjgh-2021-006951supp001.pdf]

**APPENDIX 1: Literature review search terms****MEDLINE**

|                                                                                                                                                     |
|-----------------------------------------------------------------------------------------------------------------------------------------------------|
| 1. meningococcal vaccines/ or ebola vaccines/ or yellow fever vaccine/                                                                              |
| 2. ("ebola" or "yellow fever" or "meningitis a" or "meningococcal a" or "meningococcal meningitis").ab,ti,kw.                                       |
| 3. meningitis, meningococcal/ or hemorrhagic fever, ebola/ or yellow fever/                                                                         |
| 4. 2 or 3                                                                                                                                           |
| 5. ("immuni?ation" or "vaccin*" or "ervebo" or "17d" or "MenAfriVac").ab,ti,kw.                                                                     |
| 6. 1 or 5                                                                                                                                           |
| 7. 4 and 6                                                                                                                                          |
| 8. Vaccines/ad, lj, st, sd [Administration & Dosage, Legislation & Jurisprudence, Standards, Supply & Distribution]                                 |
| 9. Immunization Programs/lj, mt, og, st, sd [Legislation & Jurisprudence, Methods, Organization & Administration, Standards, Supply & Distribution] |
| 10. implementation science/                                                                                                                         |
| 11. "Delivery of Health Care"/                                                                                                                      |
| 12. 8 or 9 or 10 or 11                                                                                                                              |
| 13. 7 and 12                                                                                                                                        |

**GLOBAL HEALTH**

|                                                                                                                                                     |
|-----------------------------------------------------------------------------------------------------------------------------------------------------|
| 1. ("immuni?ation" or "vaccin*" or "ervebo" or "17d" or "MenAfriVac").ab,ti,sh.                                                                     |
| 2. ("ebola" or "yellow fever" or "meningitis a" or "meningococcal a" or "meningococcal meningitis").ab,ti,sh.                                       |
| 3. (("immunisation" or "vaccin*") adj3 ("uptake" or "strateg*" or "feasibility" or "program*" or "campaign" or "delivery" or "roll?out")).ab,ti,sh. |
| 4. 1 and 2 and 3                                                                                                                                    |

**EMBASE**

|                                                                                                                                                      |
|------------------------------------------------------------------------------------------------------------------------------------------------------|
| 1. meningococcal vaccines/ or ebola vaccines/ or yellow fever vaccine/                                                                               |
| 2. ("ebola" or "yellow fever" or "meningitis a" or "meningococcal a" or "meningococcal meningitis").ab,ti,kw.                                        |
| 3. meningitis, meningococcal/ or hemorrhagic fever, ebola/ or yellow fever/                                                                          |
| 4. 2 or 3                                                                                                                                            |
| 5. ("immuni?ation" or "vaccin*" or "ervebo" or "17d" or "MenAfriVac").ab,ti,kw.                                                                      |
| 6. 1 or 5                                                                                                                                            |
| 7. 4 and 6                                                                                                                                           |
| 8. vaccination coverage/ or vaccination refusal/                                                                                                     |
| 9. implementation science/                                                                                                                           |
| 10. (("immunisation" or "vaccin*") adj2 ("uptake" or "strateg*" or "feasibility" or "program*" or "campaign" or "delivery" or "roll?out")).ab,ti,kw. |
| 11. 8 or 9 or 10                                                                                                                                     |
| 12. 7 and 11                                                                                                                                         |
